# Supplementary material for: Targeting mutant p53-R248W reactivates WT p53 function and alters the onco-metabolic profile
Source: PubMed Central journal article supplement (PMC9874945; doi:10.3389/fonc.2022.1094210), 2023-01-11
Supplement: DataSheet_1.pdf [file DataSheet_1.pdf]

## Brown K. et al Supplemental Tables

Table 1: p21

| <b>p21</b>     | <b>p53</b> |       |       |       |       |       | <b>IgGm</b> |       |       |       |       |       |
|----------------|------------|-------|-------|-------|-------|-------|-------------|-------|-------|-------|-------|-------|
| CP-A Carrier   | 31.03      | 31.29 | 31.07 | 31.01 | 31.54 | 31.02 | 35.84       | 36.09 | 35.89 | 36.18 | 37.02 | 36.86 |
| CP-A NSC59984  | 31.0       | 29.48 | 29.64 | 30.62 | 29.47 | 29.36 | 36.37       | 35.67 | 35.89 | 35.41 | 36.14 | 35.69 |
| ESO26 Carrier  | 35.91      | 35.69 | 35.42 | 31.25 | 30.98 | 31.36 | 54.98       | 55.97 | 56.54 | 58.27 | 59.69 | 58.53 |
| ESO26 NSC59984 | 29.85      | 30.18 | 30.07 | 30.09 | 30.53 | 30.43 | 58.26       | 59.34 | 59.26 | 59.68 | 58.98 | 58.95 |

Table 2: TIGAR

| <b>TIGAR</b>   | <b>p53</b> |        |        |        |        |        | <b>IgGm</b> |        |        |        |        |        |
|----------------|------------|--------|--------|--------|--------|--------|-------------|--------|--------|--------|--------|--------|
| CP-A Carrier   | 34.30      | 34.10  | 33.48  | 34.03  | 33.63  | 33.67  | 36.69       | 37.86  | 38.93  | 38.00  | 36.10  | 37.68  |
| CP-A NSC59984  | 34.28      | 32.87  | 31.73  | 33.79  | 33.11  | 32.66  | 36.78       | 37.02  | 36.94  | 36.10  | 37.73  | 36.67  |
| ESO26 Carrier  | 34.265     | 34.673 | 34.125 | 35.483 | 36.878 | 36.131 | 58.521      | 58.520 | 59.723 | 57.669 | 57.115 | 57.702 |
| ESO26 NSC59984 | 32.472     | 32.597 | 32.764 | 33.867 | 33.675 | 33.699 | 58.369      | 58.789 | 58.458 | 58.235 | 58.265 | 58.458 |

Table 3: CaN19

| <b>CaN19</b>   | <b>p73</b> |        |        |        |        |        | <b>IgGr</b> |        |        |        |        |        |
|----------------|------------|--------|--------|--------|--------|--------|-------------|--------|--------|--------|--------|--------|
| CP-A Carrier   | 37.12      | 36.73  | 36.14  | 43.05  | 44.53  | 41.99  | 44.27       | 43.02  | 41.53  | 49.28  | 45.37  | 50.03  |
| CP-A NSC59984  | 42.72      | 39.14  | 37.37  | 37.16  | 37.57  | 37.39  | 46.81       | 52.95  | 41.84  | 47.02  | 44.09  | 54.04  |
| ESO26 Carrier  | 39.811     | 39.868 | 39.341 | 38.516 | 38.740 | 39.670 | 58.538      | 58.487 | 58.470 | 55.645 | 50.196 | 52.875 |
| ESO26 NSC59984 | 37.181     | 37.688 | 37.341 | 36.786 | 36.723 | 37.199 | 58.341      | 59.012 | 59.376 | 54.369 | 53.158 | 50.953 |

**Supplemental Tables: Raw Ct values for CHIP data for p21, TIGAR and CaN19.**
